# Supplementary material
Source: MDPI journal article supplement (https://www.mdpi.com/2076-3417/8/1/96)
Supplement: s1 [file s1]

Figure S2

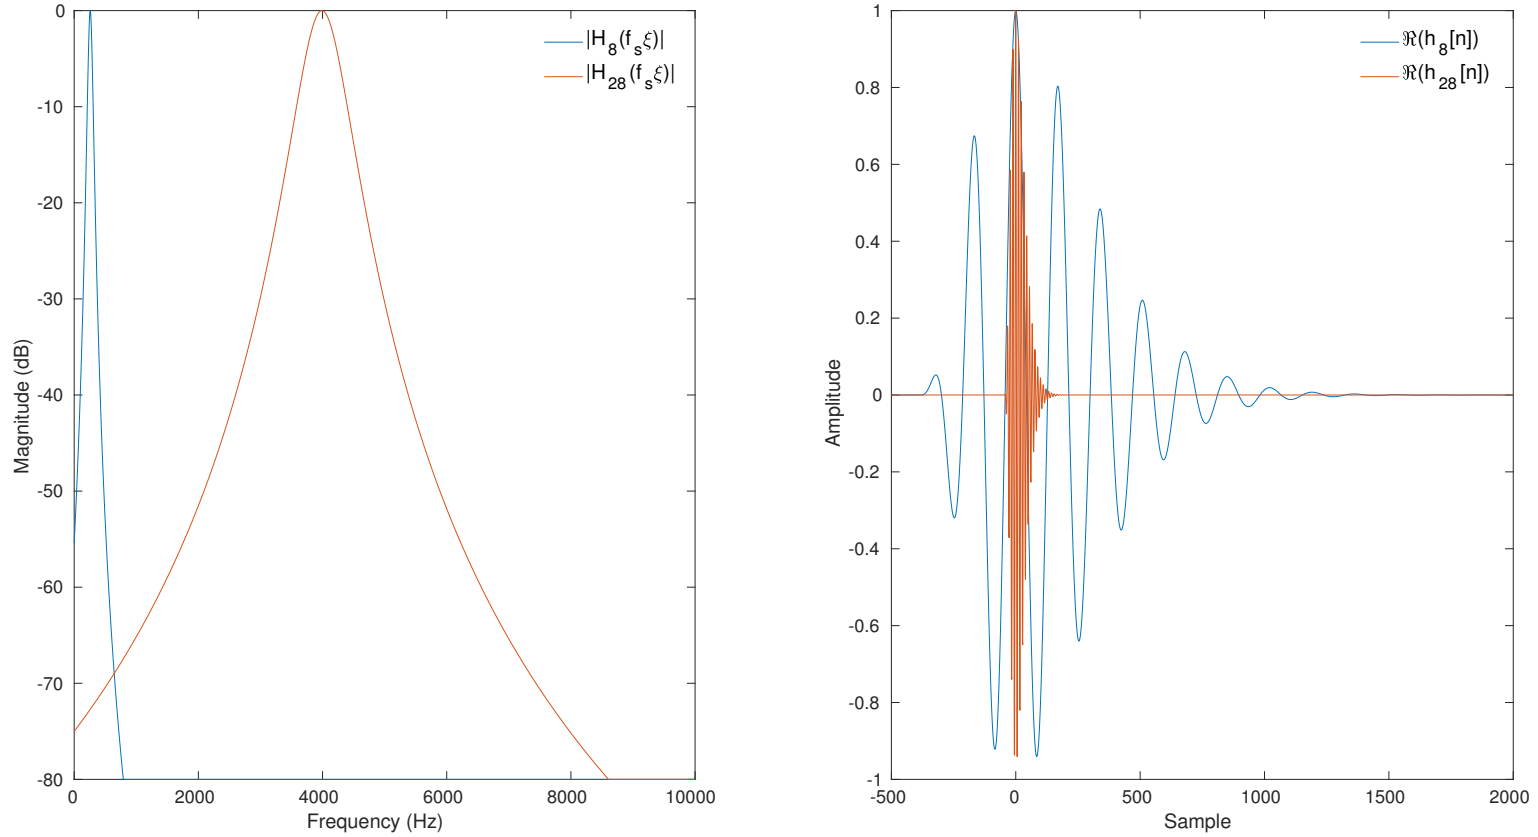

Figure 2: Left: Magnitude response (in dB) of  $|H_8(f_s\xi)|$  (blue) with  $f_8 \approx 258$  Hz and  $|H_{28}(f_s\xi)|$  (red) with  $f_{28} \approx 4000$  Hz as a function of frequency. Right: Real part of the impulse response of  $h_8[n]$  (blue) and  $h_{28}[n]$  (red). To align the phase of the cosine with the peak of the envelope and align the peaks of the envelopes of the impulse responses, a phase correction  $e^{2\pi i t_k \xi}$  was applied to  $H_{GT,\gamma,\alpha}(e^{2i\pi\xi})$  [40]. The variable  $t_k$  is the time position of the peak of the envelope in the  $k$ -th channel. As a result, all impulse responses peak at  $n = 0$ .
